# Supplementary material for: PcASTA in Procambarus clarkii, a novel astaxanthin gene affecting shell color
Source: Frontiers journal article supplement (doi:10.3389/fmars.2023.1343126), 2024-01-11
Supplement: Data_Sheet_1.docx [file Data_Sheet_1.docx]

**Supplementary**

**Figure S1. Full-length nucleotide sequence and deduced amino acid sequence of the *PcASTA* (Gene accession is OR514599). The gray box indicates the predicted zinc metallopeptidase domain, and the conserved domain is marked in red.**

**
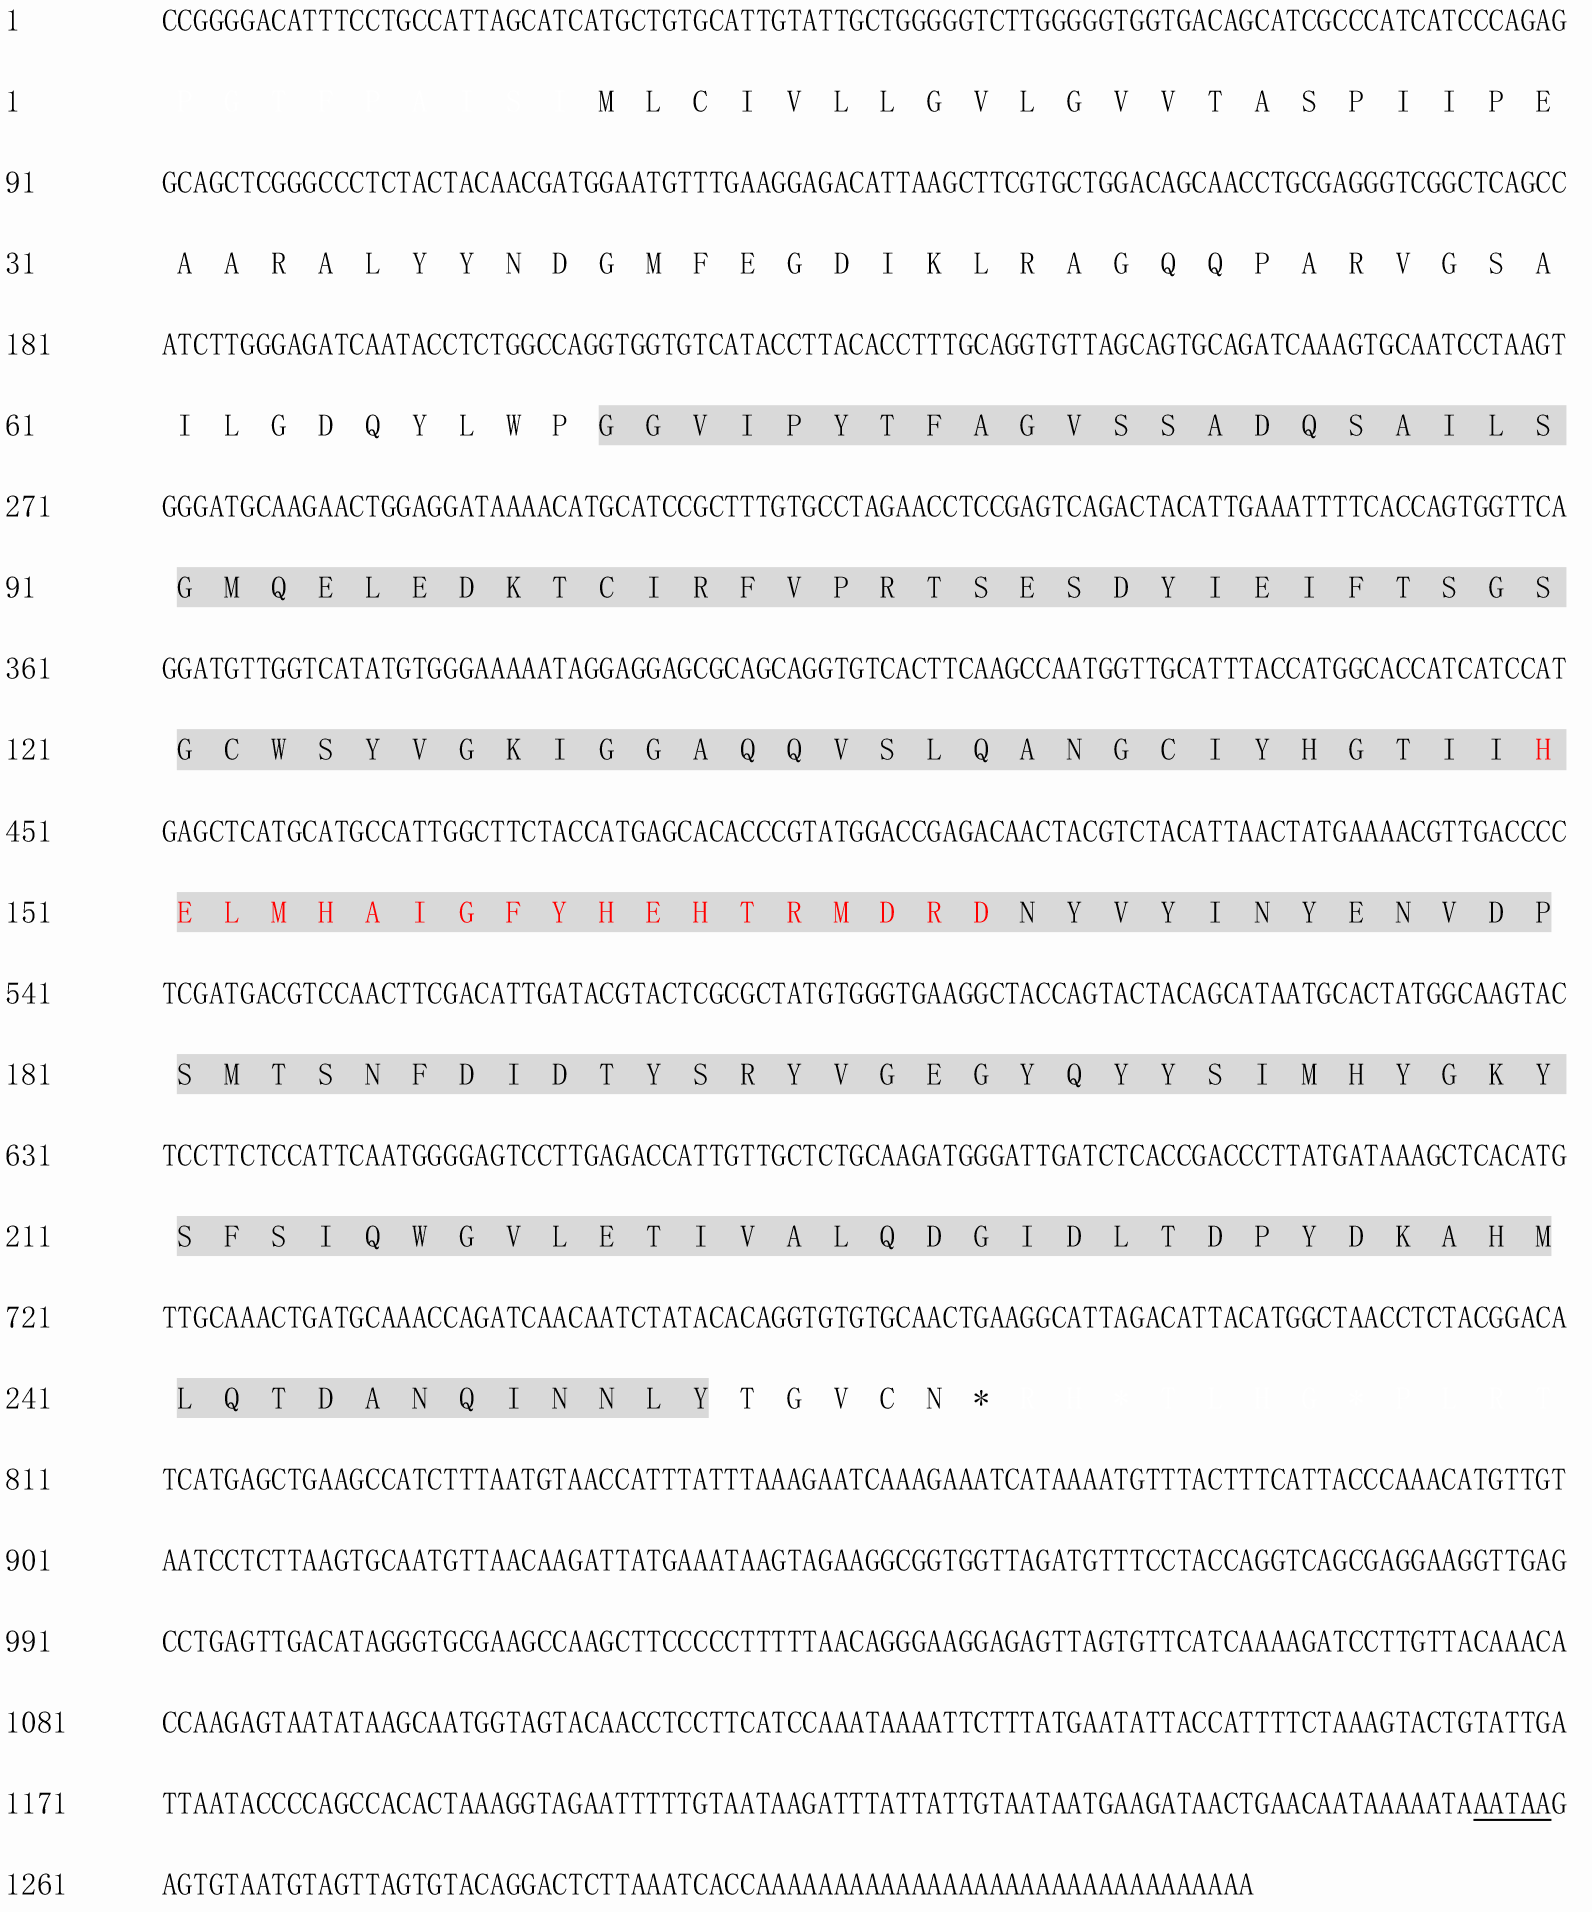
**
